# Supplementary material for: Are Cyanotoxins the Only Toxic Compound Potentially Present in Microalgae Supplements? Results from a Study of Ecological and Non-Ecological Products
Source: Toxins (Basel). 2020 Aug 28;12(9):552. doi: 10.3390/toxins12090552 (PMC7551278; doi:10.3390/toxins12090552)
Supplement: Supplementary file 1 [file toxins-12-00552-s001.xlsx]

## Sheet: Sheet1
Table S1. Complete elemental analysis of microalgae supplements analysed with ICP/OES (detection level = 0.01 µg/g)
Product	Commercial name	Al	As	Be	Bi	B	Ca	Cd	Co	Cr	Cu	Fe	K	La	Li	Mg	Mn	Mo	Na	Ni	Pb	P	Rb	Sb	Se	Si	S	Sr	Ti	Tl	V	Zn
		mg/Kg	mg/Kg	mg/Kg	mg/Kg	mg/Kg	g/100g	mg/Kg	mg/Kg	mg/Kg	mg/Kg	mg/Kg	g/100g	mg/Kg	mg/Kg	g/100g	mg/Kg	mg/Kg	g/100g	mg/Kg	mg/Kg	g/100g	mg/Kg	mg/Kg	mg/Kg	mg/Kg	g/100g	mg/Kg	mg/Kg	mg/Kg	mg/Kg	mg/Kg
1	Spirulina	308.65	<0.01	0.03	<0.01	12.25	0.15	<0.01	<0.01	2.03	1.22	940.55	1.37	<0.01	0.27	0.22	41.44	<0.01	1.25	0.7	0.54	0.81	2.51	<0.01	<0.01	364.65	0.69	23.06	22.93	11.86	0.28	20.18
2	Chlorella	43.62	0.13	0.03	<0.01	10.88	0.11	<0.01	0.13	1.19	3.53	661.64	1.18	<0.01	<0.01	0.31	68.81	<0.01	0.04	0.38	0.26	1.94	5.41	<0.01	<0.01	1251.81	0.69	7.26	9.99	22.89	<0.01	26.06
3	Alga Spirulina	482.53	<0.01	0.09	<0.01	22.53	0.18	<0.01	<0.01	2.74	1.63	1053.56	1.24	<0.01	0.59	0.22	39.65	<0.01	0.82	2.54	0.87	0.8	2.11	<0.01	<0.01	304.96	0.59	24.37	35.84	11.6	0.36	21.84
4	Espirulina	39.08	<0.01	<0.01	<0.01	0.4	0.06	<0.01	<0.01	0.62	0.3	324.34	0.83	<0.01	0.05	0.26	31.99	<0.01	0.16	0.08	<0.01	0.66	0.84	<0.01	<0.01	162.17	0.41	15.24	2.42	6.19	<0.01	7.79
5	Spirulina	40.76	<0.01	<0.01	<0.01	3.13	0.06	<0.01	<0.01	0.41	0.45	260.45	1.54	<0.01	<0.01	0.25	19.37	<0.01	1.12	0.2	0.14	1.01	2.23	<0.01	<0.01	266.77	0.75	12.47	1.96	6.26	0.03	7.62
6	Spirulina	263.73	0.34	0.04	0.35	8.78	0.13	<0.01	<0.01	1.83	0.99	896.61	1.55	<0.01	0.21	0.3	40.59	3.15	0.23	0.26	0.39	1.13	1.6	2.31	0.57	326.68	0.65	13.27	34.81	10.6	0.1	14.11
7	Chlorella	17.58	<0.01	<0.01	<0.01	7.76	0.19	<0.01	<0.01	1.06	9.14	123.59	0.54	<0.01	0.05	0.39	66.41	<0.01	0.21	0.16	<0.01	1.11	1.o6	<0.01	<0.01	271.88	0.53	20.36	1.66	19.94	<0.01	8.97
8	Spirulina	77.4	<0.01	<0.01	<0.01	2.69	1.3	<0.01	<0.01	1.11	0.65	262.05	1.21	<0.01	0.07	0.2	29.34	<0.01	0.81	0.54	0.14	2.31	1.44	<0.01	<0.01	254.3	0.59	27.56	3.72	7.23	0.04	6.55
9	Klamath & Spirulina	97.57	2.07	<0.01	<0.01	3.89	0.32	<0.01	0.31	0.79	2.85	363.18	1.1	<0.01	0.6	0.22	31.97	0.36	0.35	0.66	<0.01	0.8	2.03	<0.01	<0.01	125.14	0.8	25.42	6.14	8.21	0.62	9.41
10	Upper Klamath Algae	20.01	2.2	<0.01	<0.01	3.93	0.63	<0.01	0.06	0.28	3.68	305.89	1.48	<0.01	2.42	0.2	26.28	2.03	0.18	0.32	<0.01	0.47	2.82	<0.01	<0.01	456.78	0.9	33.47	2.82	5.26	0.21	1.9
